# Supplementary material
Source: ML conference proceedings conference paper supplement (https://openreview.net/forum?id=rRxFIOoEeF)
Supplement: supplementary_material [file nips25_DIMA_appendix.pdf › nips25_DIMA_appendix.pdf]

---

# Technical Appendix:

## Revisiting Multi-Agent World Modeling from a Diffusion-Inspired Perspective

---

Anonymous Author(s)

Affiliation

Address

email

### 1 A Proof of Theorem 2

2 *Proof.* Given the log-likelihood of the global state transition, we have the following:

$$\begin{aligned}
 \log P(s_{t+1}|s_t, a_t^{1:N}) &= \log \int p(s_{t+1}, s_{t+1}^{(1):(n)}|s_t, a_t^{1:n}) ds_{t+1}^{(1):(n)} \\
 &= \log \int \frac{p(s_{t+1}, s_{t+1}^{(1):(n)}|s_t, a_t^{(1):(n)}) \hat{q}(s_{t+1}^{(1):(n)}|s_t, a_t^{1:n}, s_{t+1})}{\hat{q}(s_{t+1}^{(1):(n)}|s_t, a_t^{1:n}, s_{t+1})} ds_{t+1}^{(1):(n)} \\
 &= \log \mathbb{E}_{\hat{q}(s_{t+1}^{(1):(n)}|s_t, a_t^{1:n}, s_{t+1})} \left[ \frac{p(s_{t+1}, s_{t+1}^{(1):(n)}|s_t, a_t^{1:n})}{\hat{q}(s_{t+1}^{(1):(n)}|s_t, a_t^{1:n}, s_{t+1})} \right] \\
 &\geq \mathbb{E}_{\hat{q}(s_{t+1}^{(1):(n)}|s_t, a_t^{1:n}, s_{t+1})} \left[ \log \frac{p(s_{t+1}, s_{t+1}^{(1):(n)}|s_t, a_t^{1:n})}{\hat{q}(s_{t+1}^{(1):(n)}|s_t, a_t^{1:n}, s_{t+1})} \right], \tag{11}
 \end{aligned}$$

3 where the last inequality results from Jensen's inequality. Under the definition and property of the  
 4 conditional Markovian forward diffusion process  $\hat{q}$  in Eqs. (2)–(5) and Assumption 1, we can rewrite  
 5 Eq. (11) as follows,

$$\log P(s_{t+1}|s_t, a_t^{1:N}) \geq \mathbb{E}_{\hat{q}(s_{t+1}^{(1):(n)}|s_{t+1})} \left[ \log \frac{p(s_{t+1}^{(n)}) \prod_{k=1}^n p(s_{t+1}^{(k-1)}|s_{t+1}^{(k)}, s_t, a_t^k)}{\prod_{k=1}^n \hat{q}(s_{t+1}^{(k)}|s_{t+1}^{(k-1)})} \right], \tag{12}$$

6 where we denote  $s_{t+1} := s_{t+1}^{(0)}$ . Then, RHS of Eq. (12) can be further simplified,

$$\begin{aligned}
 &\mathbb{E}_{\hat{q}(s_{t+1}^{(1):(n)}|s_{t+1})} \left[ \log \frac{p(s_{t+1}^{(n)}) \prod_{k=1}^n p(s_{t+1}^{(k-1)}|s_{t+1}^{(k)}, s_t, a_t^k)}{\prod_{k=1}^n \hat{q}(s_{t+1}^{(k)}|s_{t+1}^{(k-1)})} \right] \\
 &= \mathbb{E}_{\hat{q}(s_{t+1}^{(1):(n)}|s_{t+1})} \left[ \log \frac{p(s_{t+1}^{(n)}) p(s_{t+1}^{(0)}|s_{t+1}^{(1)}, s_t, a_t^1)}{\hat{q}(s_{t+1}^{(1)}|s_{t+1}^{(0)})} + \log \prod_{k=2}^n \frac{p(s_{t+1}^{(k-1)}|s_{t+1}^{(k)}, s_t, a_t^k)}{\hat{q}(s_{t+1}^{(k)}|s_{t+1}^{(k-1)})} \right] \\
 &= \mathbb{E}_{\hat{q}(s_{t+1}^{(1):(n)}|s_{t+1})} \left[ \log \frac{p(s_{t+1}^{(n)}) p(s_{t+1}^{(0)}|s_{t+1}^{(1)}, s_t, a_t^1)}{\hat{q}(s_{t+1}^{(1)}|s_{t+1}^{(0)})} + \log \prod_{k=2}^n \frac{p(s_{t+1}^{(k-1)}|s_{t+1}^{(k)}, s_t, a_t^k)}{\frac{\hat{q}(s_{t+1}^{(k-1)}|s_{t+1}^{(k)}, s_{t+1}^{(0)}) \hat{q}(s_{t+1}^{(k)}|s_{t+1}^{(0)})}{\hat{q}(s_{t+1}^{(k-1)}|s_{t+1}^{(0)})}} \right] \\
 &= \mathbb{E}_{\hat{q}(s_{t+1}^{(1):(n)}|s_{t+1})} \left[ \log \frac{p(s_{t+1}^{(n)}) p(s_{t+1}^{(0)}|s_{t+1}^{(1)}, s_t, a_t^1)}{\hat{q}(s_{t+1}^{(1)}|s_{t+1}^{(0)})} + \log \frac{\hat{q}(s_{t+1}^{(1)}|s_{t+1}^{(0)})}{\hat{q}(s_{t+1}^{(1)}|s_{t+1}^{(0)})} + \log \prod_{k=2}^n \frac{p(s_{t+1}^{(k-1)}|s_{t+1}^{(k)}, s_t, a_t^k)}{\hat{q}(s_{t+1}^{(k-1)}|s_{t+1}^{(k)}, s_{t+1}^{(0)})} \right] \\
 &= \mathbb{E}_{\hat{q}(s_{t+1}^{(1):(n)}|s_{t+1})} \left[ \log \frac{p(s_{t+1}^{(n)}) p(s_{t+1}^{(0)}|s_{t+1}^{(1)}, s_t, a_t^1)}{\hat{q}(s_{t+1}^{(1)}|s_{t+1}^{(0)})} + \sum_{k=2}^n \log \frac{p(s_{t+1}^{(k-1)}|s_{t+1}^{(k)}, s_t, a_t^k)}{\hat{q}(s_{t+1}^{(k-1)}|s_{t+1}^{(k)}, s_{t+1}^{(0)})} \right]
 \end{aligned}$$

Therefore, the evidence of dynamics transition can be bounded as follows:

$$\begin{aligned} \log P(s_{t+1}|s_t, a_t^{1:N}) &\geq \mathbb{E}_{\hat{q}(s_{t+1}^{(1)}|s_{t+1}^{(0)})} [\log p(s_{t+1}^{(0)}|s_{t+1}^{(1)}, s_t, a_t^1)] - \text{D}_{\text{KL}}[\hat{q}(s_{t+1}^{(n)}|s_{t+1}^{(0)})||p(s_{t+1}^n)] \\ &\quad - \sum_{k=2}^n \mathbb{E}_{\hat{q}(s_{t+1}^{(k)}|s_{t+1}^{(0)})} \left[ \text{D}_{\text{KL}}(\hat{q}(s_{t+1}^{(k-1)}|s_{t+1}^{(k)}, s_{t+1}^{(0)})||p(s_{t+1}^{(k-1)}|s_{t+1}^{(k)}, a_t^k, s_t)) \right]. \end{aligned} \quad (13)$$

As shown by [25], the conditional forward diffusion process  $\hat{q}$  behaves identically to the unconditional one  $q$ . Therefore, we can substitute the  $\hat{q}$  with the  $q$  in Eq. (13), concluding our proof.  $\square$

## B EDM Preconditioners and Noise Scheduler

To keep input and output signal magnitudes fixed to the same scale and avoid large variance in gradient magnitudes on a per-sample basis, Karras et al. [21] introduced the following preconditioners for normalization and re-scaling output to stabilize and improve the training dynamics of the network:

$$c_{\text{in}}^\tau = \frac{1}{\sqrt{\sigma(\tau)^2 + \sigma_{\text{data}}^2}} \quad (14)$$

$$c_{\text{out}}^\tau = \frac{\sigma(\tau)\sigma_{\text{data}}}{\sqrt{\sigma(\tau)^2 + \sigma_{\text{data}}^2}} \quad (15)$$

$$c_{\text{noise}}^\tau = \frac{1}{4} \log(\sigma(\tau)) \quad (16)$$

$$c_{\text{skip}}^\tau = \frac{\sigma_{\text{data}}^2}{\sigma_{\text{data}}^2 + \sigma(\tau)^2}, \quad (17)$$

where  $\sigma_{\text{data}} = 0.5$  in our experiment hyperparameter setup. The noise scheduler for training the diffusion model follows the same design in [21], described as follows:

$$\sigma(\tau) = \tau, \log(\sigma) \sim \mathcal{N}(P_{\text{mean}}, P_{\text{std}}^2), \quad (18)$$

where  $P_{\text{mean}} = -0.4$  and  $P_{\text{std}} = 1.2$ .

## C Behavior Learning Details

Inspired by the success of MARIE [14], we adopt MAPPO [34] to train both the actor and critic inside the imaginations of DIMA. A key distinction from MARIE is that our model explicitly predicts the global state, enabling seamless integration with CTDE techniques as well as actor-critic architectures commonly used in model-free MARL. Therefore, we implement both the actor  $\psi$  and critic  $\xi$  with two 3-layer MLPs together with ReLU activation and Layer Normalization, respectively. Similar to off-the-shelf CTDE model-free MARL algorithms, we adopt actor parameter sharing across agents.

**Critic loss function.** We utilize  $\lambda$ -return in DreamerV1 [1], which employs an exponentially weighted average of different  $k$ -steps TD targets to balance bias and variance as the regression target for the critic. Given an imagined trajectory  $\{\hat{s}_t, \hat{o}_t^{1:n}, a_t^{1:n}, \hat{r}_t, \hat{\gamma}_t\}_{t=1}^H$  over all agents,  $\lambda$ -return is calculated recursively as,

$$V_\lambda(\hat{s}_t) = \hat{r}_t^i + \hat{\gamma}_t \cdot \begin{cases} (1 - \lambda)V_\xi(\hat{s}_t) + \lambda V_\lambda(\hat{s}_{t+1}) & \text{if } t < H \\ V_\xi(\hat{s}_t) & \text{if } t = H \end{cases} \quad (19)$$

The objective of the critic  $\xi$  is to minimize the mean squared difference  $\mathcal{L}_\xi$  with  $\lambda$ -returns over imagined trajectories, as

$$\mathcal{L}_\xi = \mathbb{E}_{\pi_\psi} \left[ \sum_{t=1}^{H-1} \left( V_\xi(\hat{s}_t) - \text{sg}(V_\lambda(\hat{s}_t)) \right)^2 \right], \quad (20)$$

where  $\text{sg}(\cdot)$  denotes the stop-gradient operation. We optimize the critic loss with respect to the critic parameters  $\xi$  using the Adam optimizer.

Table 1: Behaviour learning hyperparameters.

| Hyperparameter                | Value |
|-------------------------------|-------|
| <b>Common</b>                 |       |
| Imagination horizon ( $H$ )   | 15    |
| $\lambda$                     | 0.95  |
| Clipping parameter $\epsilon$ | 0.1   |
| <b>MAMuJoCo</b>               |       |
| Discount factor $\gamma$      | 0.99  |
| $\eta$                        | 0.001 |
| <b>Bi-DexHands</b>            |       |
| Discount factor $\gamma$      | 0.95  |
| $\eta$                        | 0.01  |

**Actor loss function.** The objective for the actor  $\pi_{\psi}^i(\cdot|\hat{o}_t^i) := \pi_{\psi}(\cdot|\hat{o}_t^i)$  is to output actions that maximize the prediction of long-term future rewards made by the critic. To incorporate intermediate rewards more directly, we train the actor to maximize the same  $\lambda$ -return that was computed for training the critic. In terms of the non-stationarity issue in multi-agent scenarios, we adopt PPO updates, which introduce importance sampling for actor learning. The actor loss function for agent  $i$  is:

$$\mathcal{L}_{\psi}^i = -\mathbb{E}_{\pi_{\psi_{\text{old}}^i}} \left[ \sum_{t=0}^{H-1} \min \left( r_t^i(\psi) A_t, \text{clip}(r_t^i(\psi), 1 - \epsilon, 1 + \epsilon) A_t \right) + \eta \mathcal{H}(\pi_{\psi}^i(\cdot|\hat{o}_t^i)) \right] \quad (21)$$

where  $r_t^i(\psi) = \pi_{\psi}^i / \pi_{\psi_{\text{old}}^i}$  is the policy ratio and  $A_t = \text{sg}(V_{\lambda}(\hat{s}_t) - V_{\xi}(\hat{s}_t))$  is the advantage. Unlike MAPPO, we choose not to design agent-specific global states, as such designs are overly hand-crafted and inject task-specific human priors, which undermines the generality and soundness of the approach. Instead, we retain the environment’s original agent-agnostic global state shared among all agents, and feed it into the value function  $V_{\xi}$ . As a result, the estimated advantage function  $A_t$  is also shared across all agents during actor updates. We optimize the actor loss with respect to the actor parameters  $\psi$  using the Adam optimizer. Overall hyperparameters are shown in Table 1.

## D Illustrations of Experimental Environments

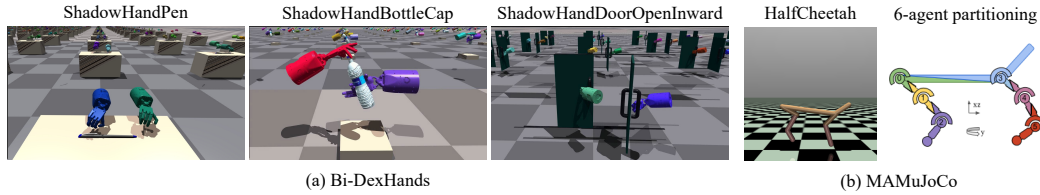

Figure 9: Illustrations of the experimental environments in our work. **Left:** Visualizations of three Bi-DexHands tasks: removing a pen cap, opening a bottle cap, and opening a door inwards. **Right:** Visualization of 6-agent partitioning w.r.t. HalfCheetah in MAMuJoCo.

## E Additional Results

### E.1 Final Returns of All Methods on MAMuJoCo and Bi-DexHands

Table 2: **Comparison of final episode returns across MAMuJoCo and Bi-DexHands benchmarks.** We report the mean final episode return and standard deviation over 4 random seeds. DIMA consistently outperforms all baselines across all chosen tasks on both MAMuJoCo and Bi-DexHands. The best result per task is highlighted in bold and shaded in blue color, while the second-best is underlined.

| Tasks              | Steps | Methods          |                 |                  |                 |                 |                 |
|--------------------|-------|------------------|-----------------|------------------|-----------------|-----------------|-----------------|
|                    |       | DIMA (Ours)      | MARIE           | MAMBA            | HASAC           | HAPPO           | MAPPO           |
| <i>MAMuJoCo</i>    |       |                  |                 |                  |                 |                 |                 |
| Ant-2x4            | 1M    | 4881 $\pm$ 756   | 4471 $\pm$ 553  | 1314 $\pm$ 756   | 1344 $\pm$ 282  | 1716 $\pm$ 449  | 859 $\pm$ 47    |
| Ant-4x2            |       | 4766 $\pm$ 450   | 1173 $\pm$ 136  | 1618 $\pm$ 931   | 850 $\pm$ 126   | 1917 $\pm$ 253  | 854 $\pm$ 41    |
| HalfCheetah-2x3    |       | 6370 $\pm$ 121   | 4045 $\pm$ 275  | 2813 $\pm$ 1580  | 2499 $\pm$ 1081 | 2628 $\pm$ 893  | 3196 $\pm$ 75   |
| HalfCheetah-3x2    |       | 6175 $\pm$ 212   | 2380 $\pm$ 1145 | 3029 $\pm$ 798   | 2872 $\pm$ 890  | 3402 $\pm$ 317  | 2936 $\pm$ 766  |
| HalfCheetah-6x1    |       | 5643 $\pm$ 163   | 1738 $\pm$ 1213 | 1848 $\pm$ 220   | 2044 $\pm$ 110  | 2939 $\pm$ 1113 | 925 $\pm$ 121   |
| Walker2d-2x3       |       | 3329 $\pm$ 1056  | 2822 $\pm$ 997  | 124 $\pm$ 19     | 1135 $\pm$ 210  | 1007 $\pm$ 282  | 752 $\pm$ 216   |
| Walker2d-3x2       |       | 4084 $\pm$ 357   | 604 $\pm$ 349   | 466 $\pm$ 103    | 958 $\pm$ 715   | 932 $\pm$ 513   | 1004 $\pm$ 480  |
| <i>Bi-DexHands</i> |       |                  |                 |                  |                 |                 |                 |
| BottleCap          | 300K  | 259.9 $\pm$ 4.1  | -               | 203.8 $\pm$ 5.2  | 210.9 $\pm$ 6.1 | 100.7 $\pm$ 3.8 | 104.0 $\pm$ 2.3 |
| DoorOpenInward     |       | 290.4 $\pm$ 29.0 | -               | 225.0 $\pm$ 79.4 | 246.3 $\pm$ 7.0 | 30.7 $\pm$ 2.5  | 65.8 $\pm$ 6.9  |
| DoorOpenOutward    |       | 367.1 $\pm$ 19.4 | -               | 177.4 $\pm$ 43.1 | 221.9 $\pm$ 7.3 | 58.8 $\pm$ 4.6  | 96.4 $\pm$ 8.5  |
| BottleCap          |       | 24.4 $\pm$ 11.4  | -               | 4.3 $\pm$ 0.4    | 0.0 $\pm$ 0.0   | 0.0 $\pm$ 0.0   | 0.0 $\pm$ 0.0   |

### E.2 Experiment Details of Imagination Evaluation across Different Conditioning Orders

To evaluate DIMA’s imagination under different conditioning orders on the 2-agent Ant [2x4] task, we collect 10 episodes by using the final policy induced by our algorithm, and randomly sample 100 trajectory segments to form our trajectory segment dataset. For each segment, we generate imagined rollouts using DIMA with different action conditioning orders.

As the EDM framework decouples inference-time sampling from training, the number of denoising steps need not match the number of agents. Thus, we set the number of denoising steps equal to 4, i.e., twice the number of agents. Letting the agent set be  $\{1, 2\}$ , we consider three conditioning orders: (i) random order: (2, 1, 1, 2), (ii) ascending order w.r.t. agent id: (1, 1, 2, 2), and (iii) descending order w.r.t. agent id: (2, 2, 1, 1).

To provide a quantitative evaluation in Figure 7 (right), we compute the L1 error per observation dimension at each timestep between the 100 sampled trajectory segments and their corresponding imagined rollouts, and accumulate the errors over the prediction horizon. All observation L1 errors are averaged across 2 agents.

## 62 F Overview of DIMA with Learning in Imaginations

63 We summarize the overall training procedure of DIMA paired with learning in imaginations in  
 64 Algorithm 1 below. We denote as  $\mathcal{D}$  the replay databuffer which stores data collected from the real  
 65 environment.

## 66 G Training Details and Hyperparameters

### 67 G.1 Model Architecture Details

68 **State decoder.** To enable decentralized execution of policies trained within DIMA’s imagination  
 69 rollouts, each agent must make decisions based solely on its local observation rather than the shared  
 70 global state. To support such policy learning, we introduce a necessary state decoder that maps the  
 71 global state  $s_t$  into the corresponding joint local observations  $o_t^{1:n}$ .

72 Due to our online model-based MARL setup, the state decoder must be continually updated under  
 73 a non-stationary data distribution which also shifts continually. Using a vanilla MLP as the state  
 74 decoder in this setting may lead to issues such as overfitting or mode collapse. To mitigate these risks,  
 75 we incorporate additional regularization into the decoder design by adopting a Vector Quantized  
 76 Variational Autoencoder (VQ-VAE) [30], which enforces a compact latent codebook representation  
 77 via vector quantization. Among various VQ-VAE variants, we choose Finite Scalar Quantization  
 78 (FSQ) [31] as our final implementation as it removes any auxiliary losses and achieves remarkably  
 79 high codebook utilization, which indicates its strong and effective regularization.

80 Our implementation is based on the open-source repository: [https://github.com/lucidrains/](https://github.com/lucidrains/vector-quantize-pytorch)  
 81 `vector-quantize-pytorch`. We simply build the encoder  $E_\varphi$  and decoder  $D_\varphi$  as MLPs to deal  
 82 with continuous non-vision global states and joint local observations. The decoder is designed with  
 83 the same hyperparameters as the encoder. The loss function for learning the autoencoder is as follows:

$$\mathcal{L}_{\text{FSQ}}(E_\varphi, D_\varphi) = \mathbb{E}_{(s_t, o_t^{1:n}) \sim \mathcal{D}} [\|o_t^{1:n} - D_\varphi(E_\varphi(s_t) + \text{sg}(\text{round}(f(E_\varphi(s_t)))) - E_\varphi(s_t))\|^2], \quad (22)$$

84 where  $f$  is a bounding function such that  $i$ -th channel/entry in  $\hat{z}_t = \text{round}(f(E_\varphi(s_t)))$  takes one of  
 85  $L_i$  unique values (here  $f : z \rightarrow \lfloor L_i/2 \rfloor \tanh(z)$  for  $i$ -th channel/entry) and  $\text{round}$  is the operation  
 86 to map real-valued inputs to the nearest integers. Therefore, we have an implicit codebook  $\mathcal{C}$  with  
 87  $|\mathcal{C}| = \prod_{i=1}^d L_i$ . After training the VAE, our state decoder can be expressed by  $g_\varphi(o_t^{1:n} | s_t) =$   
 88  $D_\varphi(\text{round}(f(E_\varphi(s_t))))$ . The hyperparameters are listed in Table 3.

89 **Diffusion model for dynamics modeling.** We use the 1-D variant adapted from the U-Net 2D  
 90 in DIAMOND [18] as the backbone of the diffusion model  $D_\theta$ . To predict the next state  $s_{t+1}$ , the  
 91 diffusion model  $D_\theta$  is initially conditioned on the current global  $s_t$ , joint action  $a_t^{1:n}$  and the diffusion  
 92 time  $\tau$ . To improve next-global-state prediction accuracy, we empirically augment the temporal  
 93 context by additionally incorporating the last 2 global states and joint actions, extending it from  $s_t$   
 94 and  $a_t^{1:n}$  to  $s_{t-2:t}$  and  $a_{t-2:t}^{1:n}$ . Note that the effect of sequential denoising is confined to the joint  
 95 action  $a_t^{1:n}$  conditioning at the current timestep  $t$ , and does not extend to the past joint actions.

96 Inspired by the success of DIAMOND, we directly adopt the same conditioning mechanism in  
 97 DIAMOND, and use temporal stacking for global state conditioning and adaptive group normalization  
 98 for joint action and diffusion time conditioning. The hyperparameters are listed in Table 3.

99 **Transformer as reward and termination model.** The Transformer for predicting the reward and  
 100 termination is built upon the implementation of minGPT [29]. Given a fixed imagination horizon  $H$ ,  
 101 it first takes a sequence of length  $2H$  composed of global states and joint actions  $(\dots, s_t, a_t^{1:n}, \dots)$ ,  
 102 and encodes every single global state and joint action into  $d_e$ -dimensional embedding tensor via  
 103 2 separate encoding functions. Then the sequence tensor of shape  $2H \times d_e$  is forwarded through  
 104 fixed Transformer blocks. Finally, the Transformer predicts reward and termination via two separate  
 105 3-layer MLP heads  $f_\phi(r_t | s_{\leq t}, a_{\leq t}^{1:n})$  and  $f_\phi(\gamma_t | s_{\leq t}, a_{\leq t}^{1:n})$ , respectively. In general, the loss function  
 106 is described by

$$\mathcal{L}_\phi = \mathbb{E} \left[ \sum_{t=1}^H -\log f_\phi(r_t | s_{\leq t}, a_{\leq t}^{1:n}) - \log f_\phi(\gamma_t | s_{\leq t}, a_{\leq t}^{1:n}) \right]. \quad (23)$$

107 But in practice, we optimize the reward prediction with a smooth L1 loss function and the termination  
108 prediction with a cross-entropy loss function. The hyperparameters are listed in Table 3.

## 109 **G.2 Computational Resources Used for Training**

110 All our experiments including the evaluation of chosen baselines are run on a machine with a single  
111 NVIDIA RTX 4090 GPU, a 24-core CPU, and 256GB RAM.

## 112 **G.3 Baseline Implementation Details**

113 In our experiments, we reran and evaluated all baseline methods. To ensure fairness for comparisons,  
114 we followed the optimal hyperparameters provided in their official implementations, listed below:

- 115 • MARIE: <https://github.com/breez3young/MARIE>;
- 116 • MAMBA: <https://github.com/jbr-ai-labs/mamba>;
- 117 • HASAC, HAPPO and MAPPO: <https://github.com/PKU-MARL/HARL>.

## 118 **G.4 DIMA hyperparameters**

119 We list the hyperparameters of DIMA paired with learning in imaginations in Table 4.

## 120 **H Broader Impact**

121 Our work introduces DIMA, a diffusion-inspired multi-agent world model that significantly improves  
122 sample efficiency in cooperative multi-agent control environments. By enabling more faithful  
123 imagined rollouts, DIMA can accelerate the development of complex autonomous systems—such  
124 as multiple real robots coordination, traffic management, and energy-efficient buildings—thereby  
125 reducing real-world trial costs. However, these capabilities also carry potential risks: misuse of high-  
126 fidelity neural simulators for adversarial planning could exacerbate privacy and security concerns.

---

**Algorithm 1:** DIMA paired with learning in imaginations

---

**Procedure training\_loop():**

```
for epochs do
    collect_experience(steps_collect)
    for steps_state_decoder do
        update_state_decoder()
    for steps_diffusion_model do
        update_diffusion_model()
    for steps_reward_end_model do
        update_reward_end_model()
    for steps_actor_critic do
        update_actor_critic()
```

**Procedure collect\_experience(n):**

```
s0, o01:n ← env.reset()
for t = 0 to n - 1 do
    Sample ati ∼ πψi(ati|oti), ∀ agent i
    st+1, ot+11:n, rt, γt ← env.step(at1:n)
    D ← D ∪ {st+1, ot+11:n, at1:n, rt, γt}
    if γt = 1 then
        st+1, ot+11:n ← env.reset()
```

**Procedure update\_state\_decoder():**

```
Sample state-observation pair (st, ot1:n) ∼ D
Compute LFSQ in Eq. (22)
Update State Decoder gφ
```

**Procedure update\_diffusion\_model():**

```
Sample sequence (st-L+1, at-L+11:n, ..., st, at1:n, st+1) ∼ D
Sample log(σ) ∼ N(Pmean, Pstd2) and get τ = σ since σ(τ) := τ
Sample st+1τ ∼ N(xt+10, σ2I)
Sample a chosen agent id k ∼ Uniform{1, 2, ..., n}
Compute st+1(0) = Dθ(st+1τ; τ, atk, st-L+1:t, at-L+1:t-11:n)
                                     extra temporal context
Compute loss L(θ) = ||st+1(0) - st+1||2 in Eq. (9)
Update Diffusion Model Dθ
```

**Procedure update\_reward\_end\_model():**

```
Sample sequence (st, at1:n, rt, γt, ..., st+H-1, at+H-11:n, rt+H-1, γt+H-1) ∼ D
for i = t to t + H - 1 do
    Compute r̂i ∼ fφ(r̂i|s≤i, a≤i1:n) and γ̂i ∼ fφ(γ̂i|s≤i, a≤i1:n)
Compute Lφ = ∑i=tt+H-1 CrossEntropy(γ̂i, γi) + SmoothL1(r̂i, ri) corresponding to Eq. (23)
Update Reward and Termination Model fφ
```

**Procedure update\_actor\_critic():**

```
Set the joint action condition order ρ = (i1, i2, ..., in)
Sample starting point (st-L+1, ot-L+11:n, at-L+11:n, ..., st, ot1:n) ∼ D of the imagination
Let ôt1:n = ot1:n
for i = t to t + H - 1 do
    Sample aij ∼ πψj(aij|ôij) ∀ agent j
    Sample the reward r̂i and the termination γ̂i with fφ
    Sample the next global state ŝt+1 by iteratively denoising with Dθ and ρ
    Sample the next joint observation state ôt+11:n with gφ
Update actor πψi and critic Vξ via Lξ and Lψi over imaginations {ŝi, ôi1:n, ai1:n, r̂i, γ̂i}i=tt+H-1
```

---

Table 3: Architecture details.

| Hyperparameter                                            | Value                        |
|-----------------------------------------------------------|------------------------------|
| <b>State Decoder (<math>g_\varphi</math>)</b>             |                              |
| MLP layers                                                | 3                            |
| Hidden size                                               | 512                          |
| Activation                                                | GELU [69]                    |
| FSQ Levels $L_i$                                          | [8, 6, 5]                    |
| <b>Diffusion Model (<math>D_\theta</math>)</b>            |                              |
| Global state conditioning mechanism                       | Temporal stacking            |
| Joint action conditioning mechanism                       | Adaptive Group Normalization |
| Diffusion time conditioning mechanism                     | Adaptive Group Normalization |
| Residual blocks layers                                    | [2, 2, 2]                    |
| Residual blocks channels                                  | [64, 64, 64]                 |
| Residual blocks conditioning dimension                    | 256                          |
| <b>Reward and Termination Model (<math>f_\phi</math>)</b> |                              |
| Embedding dimension $d_e$                                 | 256                          |
| Transformer block layers                                  | 6                            |
| Attention heads                                           | 4                            |
| Embedding dropout                                         | 0.1                          |
| Attention dropout                                         | 0.1                          |
| Residual dropout                                          | 0.1                          |



Table 4: Hyperparameters for DIMA.

| Hyperparameter                                       | Value                                                                                                                               |
|------------------------------------------------------|-------------------------------------------------------------------------------------------------------------------------------------|
| Batch size for State Decoder training                | 256                                                                                                                                 |
| Batch size for Diffusion Model training              | 64                                                                                                                                  |
| Batch size for Reward and Termination Model training | 128                                                                                                                                 |
| Optimizer for State Decoder                          | AdamW                                                                                                                               |
| Optimizer for Diffusion Model                        | AdamW                                                                                                                               |
| Optimizer for Reward and Termination Model           | AdamW                                                                                                                               |
| Optimizer for Actor & critic                         | Adam                                                                                                                                |
| Learning rate for State Decoder                      | 0.0003                                                                                                                              |
| Learning rate for Diffusion Model                    | 0.0001                                                                                                                              |
| Learning rate for Reward and Termination Model       | 0.0001                                                                                                                              |
| Learning rate for Actor & critic                     | 0.0005                                                                                                                              |
| Gradient clipping for State Decoder                  | 10                                                                                                                                  |
| Gradient clipping for Diffusion Model                | 1                                                                                                                                   |
| Gradient clipping for Reward and Termination Model   | 10                                                                                                                                  |
| Gradient clipping for Actor & critic                 | 10                                                                                                                                  |
| Weight decay for State Decoder                       | 0.01                                                                                                                                |
| Weight decay for Diffusion Model                     | 0.01                                                                                                                                |
| Weight decay for Reward and Termination Model        | 0.01                                                                                                                                |
| $\lambda$ for $\lambda$ -return computation          | 0.95                                                                                                                                |
| Discount factor $\gamma$                             | see Table 1                                                                                                                         |
| Entropy coefficient                                  | see Table 1                                                                                                                         |
| Buffer size (transitions)                            | $2.5 \times 10^5$                                                                                                                   |
| Training steps per epoch                             | 200                                                                                                                                 |
| Training steps per epoch for policy learning         | 4                                                                                                                                   |
| Sampling Environment steps per epoch                 | 200 in MAMuJoCo<br>500 in Bi-DexHands                                                                                               |
| PPO epochs                                           | 5                                                                                                                                   |
| PPO Clipping parameter $\epsilon$                    | 0.1                                                                                                                                 |
| Number of imagined rollouts                          | 600                                                                                                                                 |
| Imagination horizon $H$                              | 15                                                                                                                                  |
| Diffusion sampling solver                            | Euler                                                                                                                               |
| Number of denoising steps                            | $\begin{cases} 2 \cdot  \mathcal{N}  & \text{if }  \mathcal{N}  \leq 2 \\  \mathcal{N}  & \text{if }  \mathcal{N}  > 2 \end{cases}$ |
